# Supplementary material for: The Effects of Body Mass on Dung Removal Efficiency in Dung Beetles
Source: PLoS One. 2014 Sep 17;9(9):e107699. doi: 10.1371/journal.pone.0107699 (PMC4168130; doi:10.1371/journal.pone.0107699)
Supplement: Appendix S1 — Details of GLMs used for the lab experiment without the offset term. Factor estimates and statistical significance (GLM) for the dung removed in relation to the tunneler (sample size = 33) and dweller (sample size = 30) species. Also, models with body mass of each species in relation to the percentage of removed dung are presented. Significance codes: ‘***’p<0.001; ‘**’ p<0.01 ‘*’ p<0.05. (XLSX) [file pone.0107699.s001.xlsx]

## Sheet: Appendix S1
Appendix S1
Lab experiment
S1) Body mass
TUNNELER				DWELLER
Distribution: Gaussian	Estimate	t value	p	Distribution: Gamma	Estimate	t value	p
Intercept	77.172	27.19	***	Intercept	68.133	43.84	***
Body mass	51.799	2.84	**	Body mass	205.35	2.89	**
S2) Species
(without offset)
TUNNELER SPECIES				DWELLER SPECIES
Reference level: Control				Reference level: Control
Distribution: Gaussian	Estimate	t value	p	Distribution: Gamma	Estimate	t value	p
Intercept	67.196	14.85	***	Intercept	64.55	17.82	***
Anoplotrupes stercorosus	27.315	5.4	***	Parammoecius corvinus	4.23	1.03	NS
Geotrupes stercorarius	17.59	3.48	**	Acrossus depressus	6.22	1.5	NS
Onthophagus fracticornis	9.32	1.84	NS	Teuchestes fossor	7.94	1.91	NS
Trypocopris pyreneaus	17	3.31	**	Acrossus rufipes	16.14	3.34	**
Interaction Test	Value	Chisq	p	Interaction Test	Value	Chisq	p
A. stercorosus - G. stercorarius	9.72	9.24	*	A. rufipes - P. corvinus	11.9	10.14	*
A. stercorosus - O. fracticornis	17.98	31.62	***	A. rufipes - A. depressus	9.92	6.93	NS
A. stercorosus - T. pyrenaeus	10.3	9.69	*	A. rufipes - T. fossor	8.2	4.67	NS
G. stercorarius - O. fracticornis	8.27	6.68	*	P. corvinus - A. depressus	-1.98	0.51	NS
G. stercorarius - T. pyrenaeus	0.58	0.03	NS	P. corvinus - T. fossor	-3.7	1.74	NS
O. fracticornis - T. pyrenaeus	-7.68	5.38	NS	A. depressus - T. fossor	-1.72	0.37	NS
